# Supplementary material
Source: Springer Nature journal article supplement (https://www.springermedizin.de/resource/supplementary/12906_2011_440_MOESM2_ESM.pdf/9519794)

**A**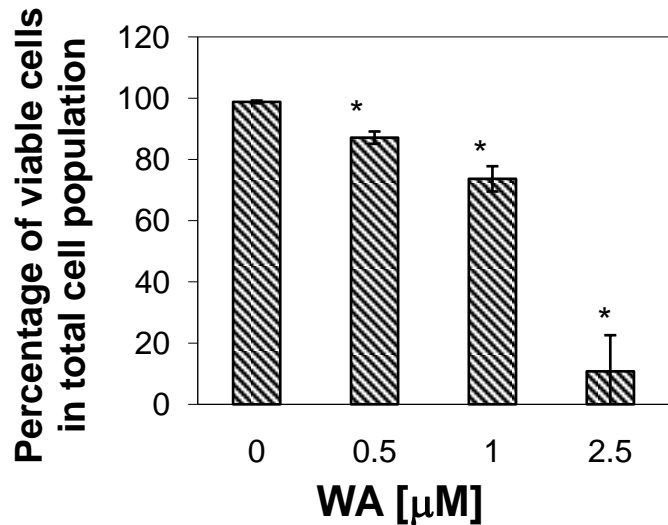**B**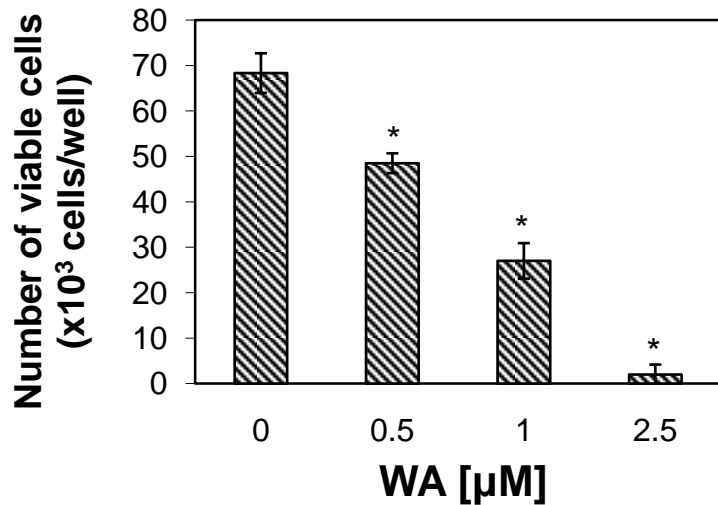

Supplement: MOESM2 [file 9519794]
